# Supplementary material for: Simultaneous Determination of Uric Acid and Caffeine by Flow Injection Using Multiple-Pulse Amperometry
Source: MDPI journal article supplement (doi:10.3390/bios13070690), 2023-06-29
Supplement: s1 [file s1]

SUPPLEMENTARY MATERIAL

# Simultaneous Determination of Uric Acid and Caffeine by Flow Injection Using Multiple-Pulse Amperometry

Ademar Wong <sup>1,2</sup>, Anderson M. Santos <sup>3</sup>, Maria H. A. Feitosa <sup>3</sup>, Orlando Fatibello-Filho <sup>3</sup>,  
Fernando C. Moraes <sup>3,\*</sup> and Maria D. P. T. Sotomayor <sup>1,2</sup>

<sup>1</sup> Institute of Chemistry, São Paulo State University (UNESP), Araraquara 14801-970, SP, Brazil

<sup>2</sup> National Institute for Alternative Technologies of Detection, Toxicological Evaluation and Removal of Micropollutants and Radioactives (INCT-DATREM), Araraquara 14801-970, SP, Brazil

<sup>3</sup> Department of Chemistry, Federal University of São Carlos (UFSCar), São Carlos 13560-970, SP, Brazil

\* Correspondence: fcmoraes@ufscar.br

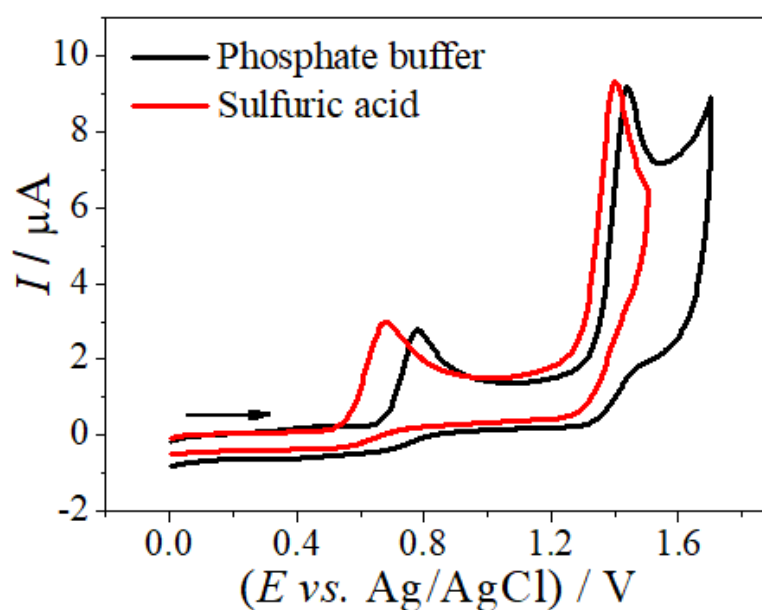

**Figure S1.** Study of supporting electrolytes phosphate buffer and sulfuric acid at pH 4.5 using CTP-BDD electrode at  $v = 50 \text{ mV s}^{-1}$ .

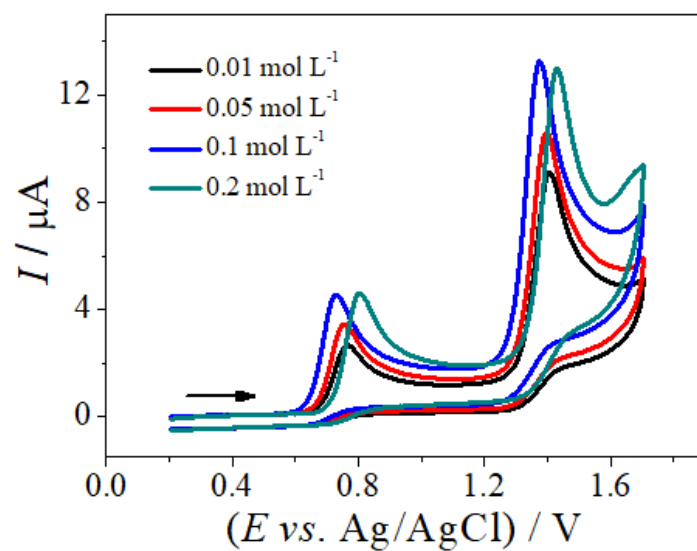

**Figure S2.** Effect of sulfuric acid concentrations (0.01; 0.05; 0.1 and 0.2 mol L<sup>-1</sup>) on the cyclic voltammograms using a CPT-BDD electrode and  $v = 50 \text{ mV s}^{-1}$ .
